# Supplementary material for: Sampling Strategies and Biodiversity of Influenza A Subtypes in Wild Birds
Source: PLOS journal article supplement (doi:10.1371/journal.pone.0090826), 2014-03-05
Supplement: S11 (10.1371/journal.pone.0090826.s011) [file journal.pone.0090826.s011]

Supplementary Table S9. Number of subtypes found uniquely in North American flyways and/or bird orders.

| Subtypes found in:     | Pacific Flyway | Central Flyway | Mississippi Flyway | Atlantic Flyway |
|------------------------|----------------|----------------|--------------------|-----------------|
| Anseriformes only      | 2              | 2              | 2                  | 0               |
| Charadriiformes only   | 1              | 0              | 0                  | 4               |
| Procellariiformes only | 0              | 0              | 0                  | 0               |
| Multiple bird orders   | 0              | 0              | 0                  | 0               |
| Total                  | 3              | 2              | 2                  | 4               |
